# Supplementary material for: Synergistic enhancement of urban haze by nitrate uptake intotransported hygroscopic particles in the Asian continental outflow
Source: Copernicus journal article supplement (doi:10.5194/acp-2019-1171), 2020-02-06
Supplement: Supplementary file 1 [file acp-2019-1171-supplement.pdf]

Supplementary Information

Synergistic enhancement of urban haze by nitrate uptake into transported hygroscopic particles in the Asian continental outflow

J. Seo, Y. B. Lim, D. Youn, J. Y. Kim and H. C. Jin

### Text S1. Statistical reconstruction of the NH<sub>3</sub> data for Seoul

We reconstructed the NH<sub>3</sub> concentration for Seoul from data measured at Gwangjin (37.545°N, 127.096°E) over 346 days from September 2010 to August 2011 (Phan et al., 2013). The average ( $\mu_{\text{NH}_3}$ ) and standard deviation ( $\sigma_{\text{NH}_3}$ ) of the measured NH<sub>3</sub> concentration was  $10.9 \pm 4.25$  ppb, and there were significant linear relationships with three meteorological variables [ $T$ , RH, and wind speed (WS)] and three gaseous pollutants (SO<sub>2</sub>, NO<sub>2</sub>, and CO). To construct a multiple linear regression model of the estimated (reconstructed) NH<sub>3</sub> time series ( $[\text{NH}_3]_{\text{est}}$ ), we used the average ( $\mu_x$ ) and standard deviation ( $\sigma_x$ ) of the six dependent variables ( $X$ ) as the normalized form ( $[X]_{\text{nor}} = (X - \mu_x)/\sigma_x$ ) for the target period (January 2012 to December 2014), as follows:

$$[\text{NH}_3]_{\text{est}} = \alpha(c_{\text{SO}_2}[\text{SO}_2]_{\text{nor}} + c_{\text{NO}_2}[\text{NO}_2]_{\text{nor}} + c_{\text{CO}}[\text{CO}]_{\text{nor}} + c_T[T]_{\text{nor}} + c_{\text{RH}}[\text{RH}]_{\text{nor}} + c_{\text{WS}}[\text{WS}]_{\text{nor}}) + \mu_{\text{NH}_3}$$

To obtain  $[\text{NH}_3]_{\text{est}}$ , which retains some of the statistical characteristics of the measured NH<sub>3</sub>, we assumed that (i) the average and standard deviation of  $[\text{NH}_3]_{\text{est}}$  should equal the measured value ( $10.9 \pm 4.25$  ppb; Phan et al., 2013) and (ii) the variance explained by each independent variable (or the relative size of  $R^2$  between NH<sub>3</sub> and each independent variable) should be the same as for the measured data (Phan et al., 2013). To find a value of  $[\text{NH}_3]_{\text{est}}$  that satisfies the first and second assumptions, we carefully adjusted the coefficients ( $c_x$ ) for each independent variable (Table S1) and obtained coefficient  $\alpha$  ( $= 3.23$ ). Fig. S3d shows the statistically reconstructed NH<sub>3</sub>.

**Table S1: The coefficients for the dependent variables used in the multiple regression model to predict NH<sub>3</sub>.**

| Variables ( $X$ ) | Correlation coefficient ( $r$ ) [Phan <i>et al.</i> , 2013] | Coefficient of determination ( $R^2$ ) [Phan <i>et al.</i> , 2013] | Mean ( $\mu$ ) and standard deviation ( $\pm \sigma$ ) [This study] | Coefficients ( $c_x$ ) |
|-------------------|-------------------------------------------------------------|--------------------------------------------------------------------|---------------------------------------------------------------------|------------------------|
| SO <sub>2</sub>   | -0.179**                                                    | 0.032                                                              | $5.57 \pm 1.87$ (ppb)                                               | -0.621                 |
| NO <sub>2</sub>   | +0.108*                                                     | 0.011                                                              | $39.9 \pm 12.0$ (ppb)                                               | -0.274                 |
| CO                | +0.151**                                                    | 0.023                                                              | $0.60 \pm 0.21$ (ppm)                                               | +1.377                 |
| $T$               | +0.487**                                                    | 0.237                                                              | $12.8 \pm 11.1$ (°C)                                                | +1.000                 |
| RH                | +0.505**                                                    | 0.255                                                              | $59.9 \pm 15.2$ (%)                                                 | +0.377                 |
| WS                | -0.243**                                                    | 0.059                                                              | $2.74 \pm 0.86$ (m s <sup>-1</sup> )                                | -0.053                 |

\* Significant correlation at the 95% or higher level ( $p < 0.05$ )

\*\* Significant correlation at the 99% or higher level ( $p < 0.01$ )

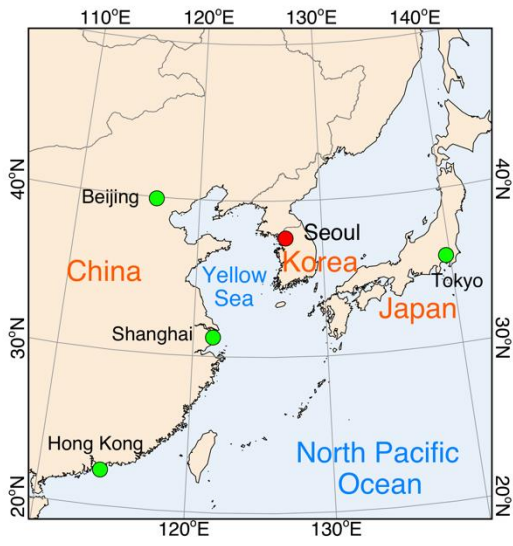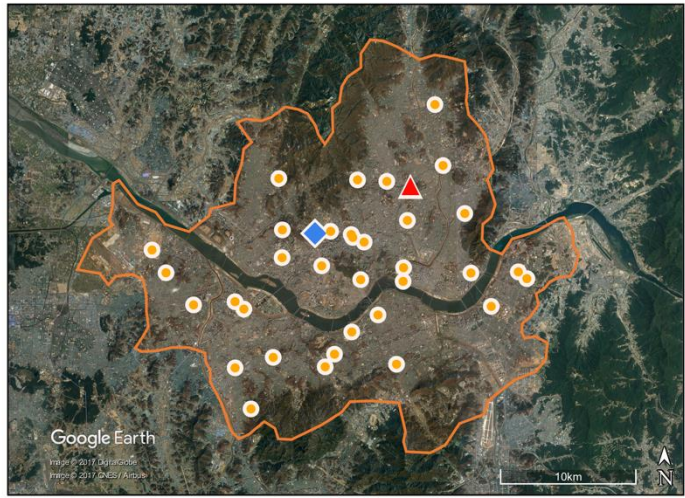

**Figure S1: The locations of Seoul (left panel) and the KIST PM<sub>2.5</sub> sampling site (red triangle), weather station (blue diamond), and Korea Ministry of Environment (KMOE) air quality monitoring sites (34 yellow circles) in Seoul (right panel).**

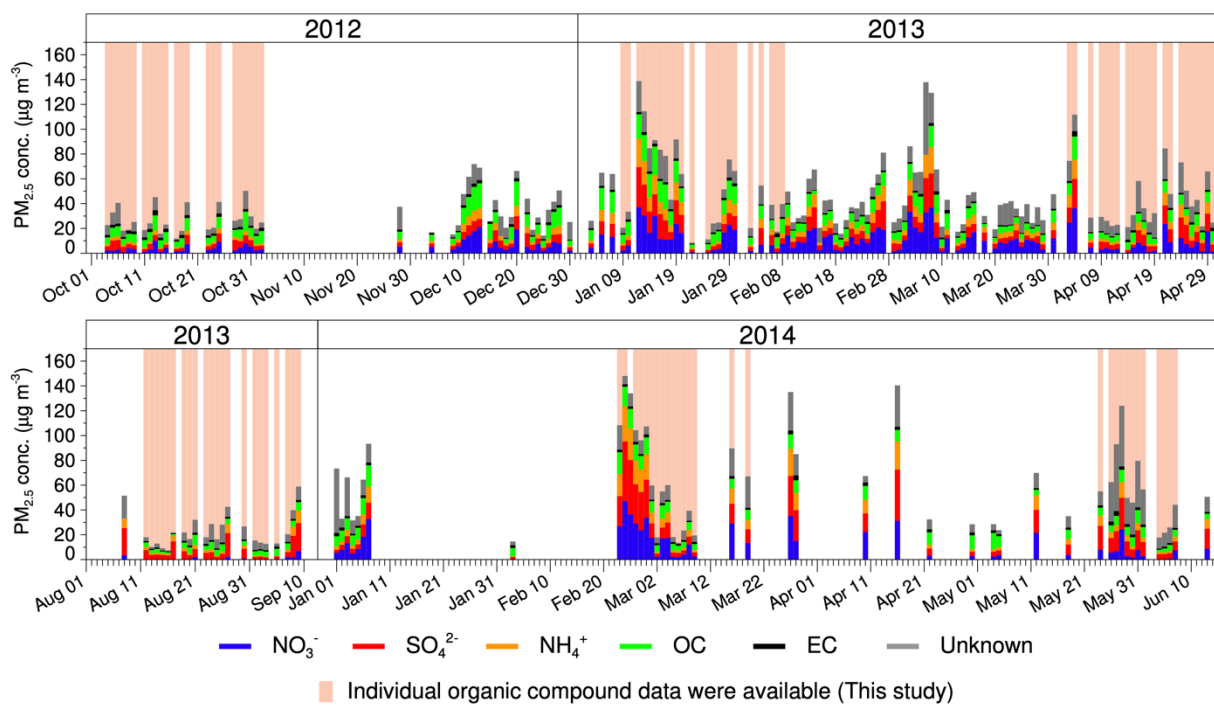

**Figure S2: Time series of the chemical composition of PM<sub>2.5</sub> measured at the KIST site.**

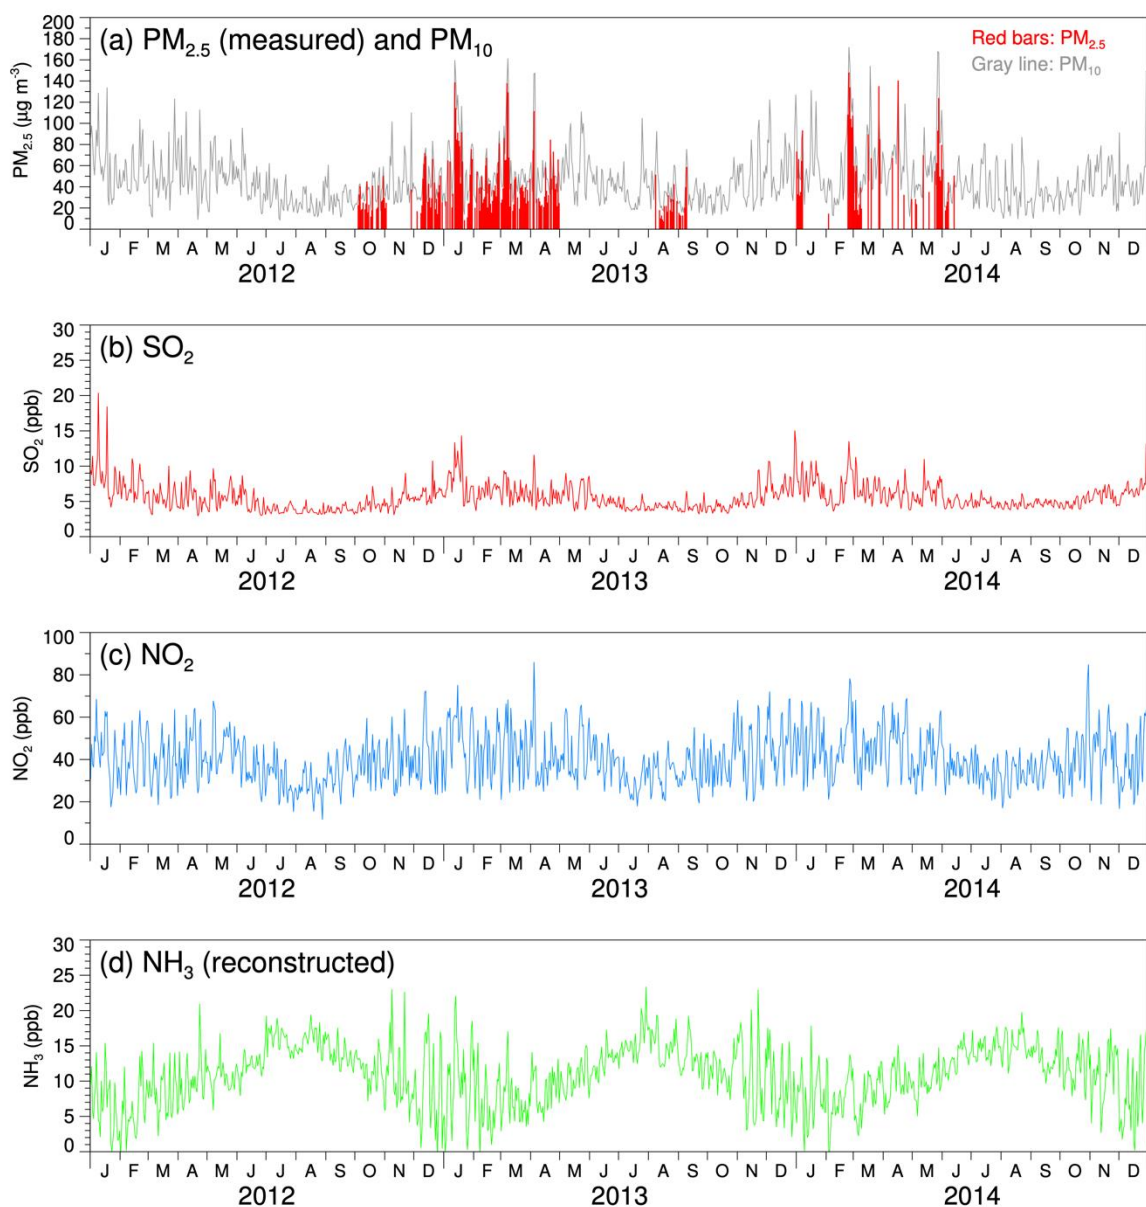

**Figure S3: Daily time series of (a) PM<sub>10</sub> and measured PM<sub>2.5</sub> (b) SO<sub>2</sub>, (c) NO<sub>2</sub>, and (d) statistically reconstructed NH<sub>3</sub> concentrations. The PM<sub>2.5</sub> concentrations are measured for samples collected at the KIST site. The PM<sub>10</sub>, SO<sub>2</sub>, and NO<sub>2</sub> concentrations are the average daily concentrations for 34 air quality monitoring sites in Seoul. The NH<sub>3</sub> concentrations are reconstructed using the measured data for Seoul (Gwangjin site; 37.545°N, 127.096°E) from September 2010 to August 2011 (Phan et al., 2013).**

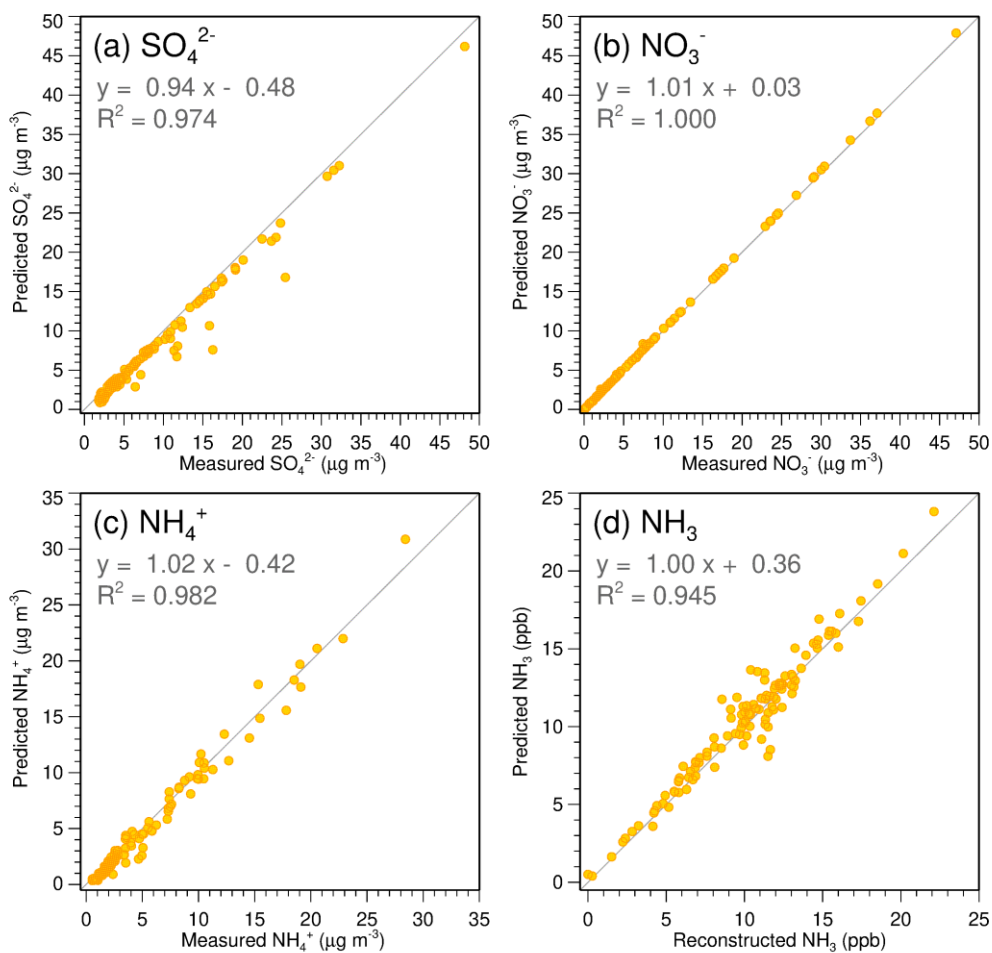

**Figure S4: Evaluation of the thermodynamic model. Comparisons of the predicted and measured (a)  $\text{SO}_4^{2-}$ , (b)  $\text{NO}_3^-$ , (c)  $\text{NH}_4^+$ , and (d)  $\text{NH}_3$  concentrations. The gray solid lines indicate a 1-to-1 relationship. Note that reconstructed  $\text{NH}_3$  concentrations are used in this study due to the absence of  $\text{NH}_3$  measurements for Seoul during the analysis period.**

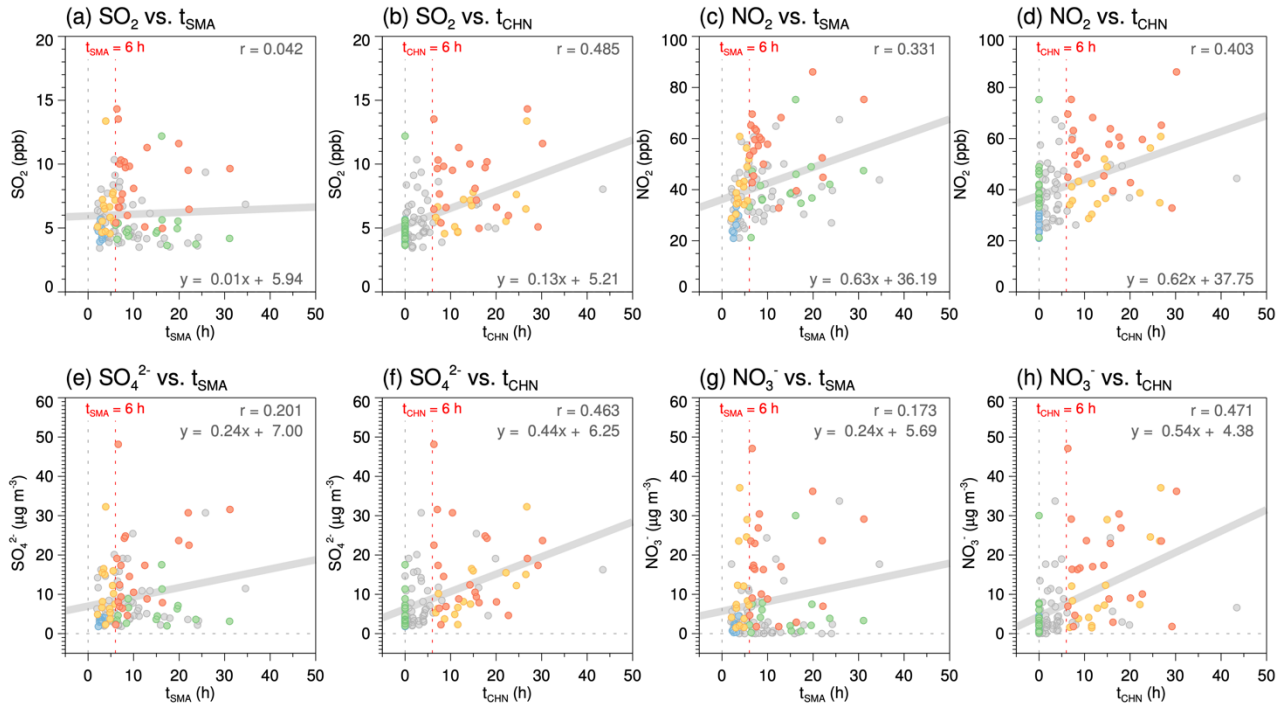

**Figure S5: Scatterplots of gaseous species ( $\text{SO}_2$  and  $\text{NO}_2$ ) and  $\text{PM}_{2.5}$  inorganic species ( $\text{SO}_4^{2-}$  and  $\text{NO}_3^-$ ) concentrations versus the average daily residence time of backward trajectories in the SMA ( $t_{\text{SMA}}$ ) and the NCP and YRD ( $t_{\text{CHN}}$ ).**

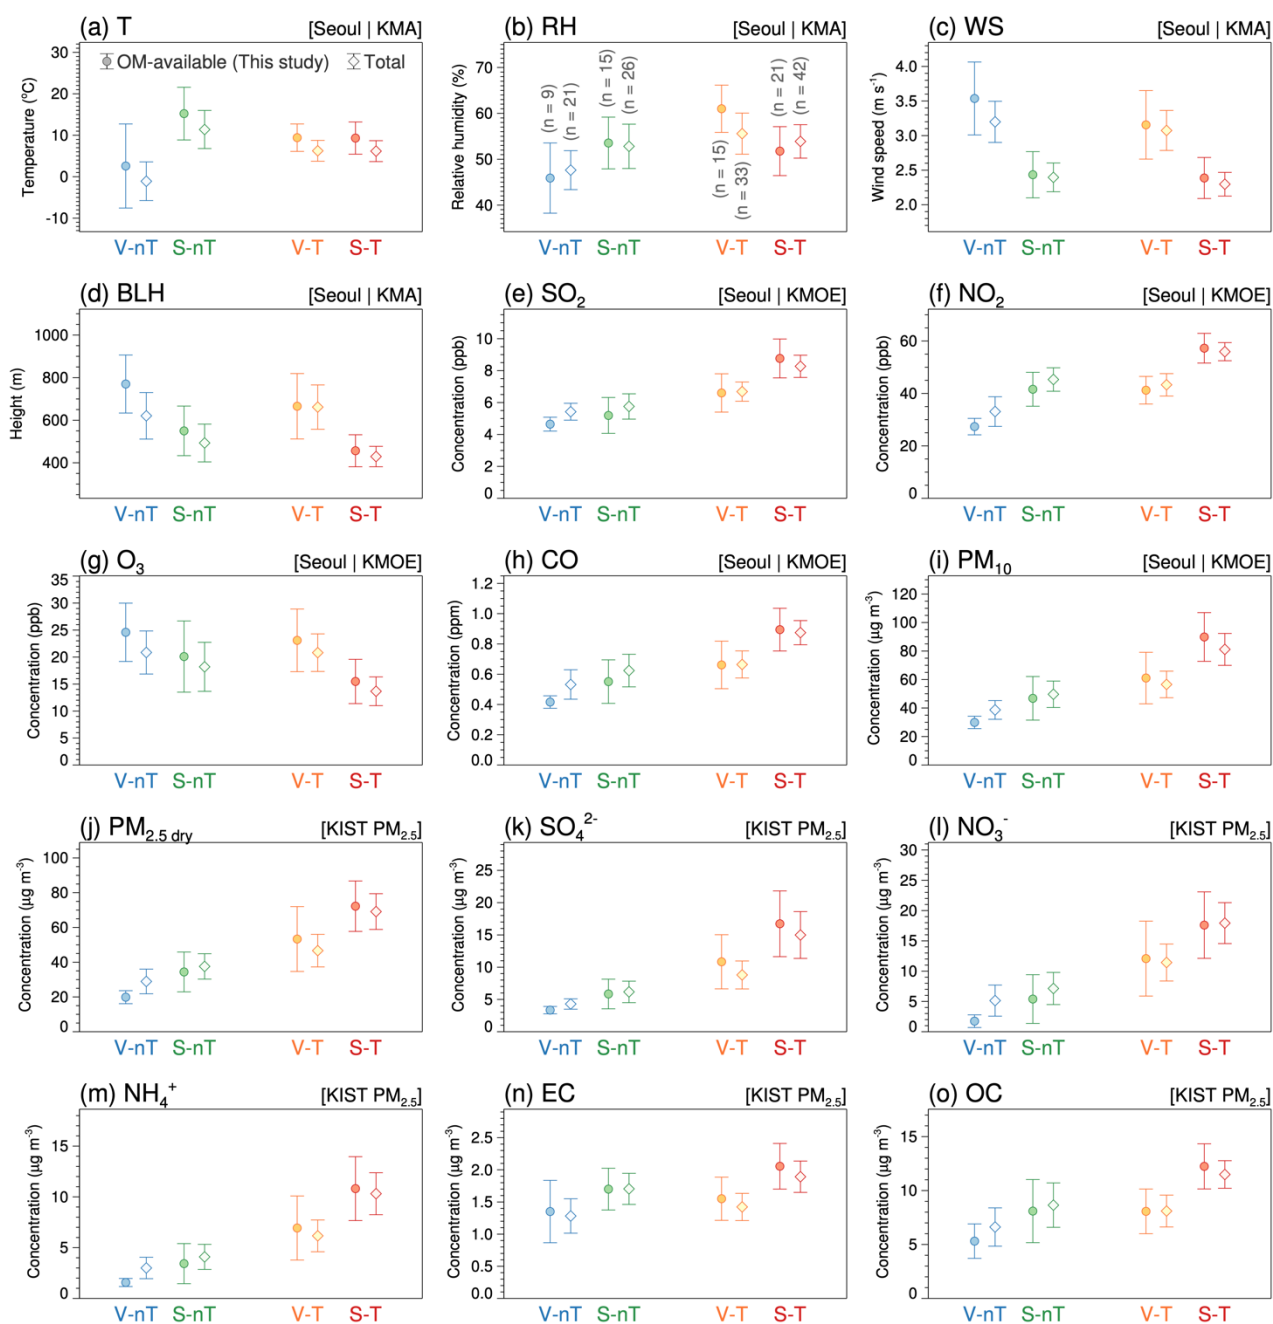

**Figure S6: Comparison of average meteorological factors from the Seoul weather station ((a) temperature (T), (b) relative humidity (RH), (c) wind speed (WS), and (d) boundary layer height (BLH)), concentrations of the five representative pollutants from the KMOE air quality monitoring network ((e) SO<sub>2</sub>, (f) NO<sub>2</sub>, (g) O<sub>3</sub>, (h) CO, and (i) PM<sub>10</sub>), and PM<sub>2.5</sub> compositions form the KIST site ((j) dry mass concentration (PM<sub>2.5 dry</sub>), (k) sulfate (SO<sub>4</sub><sup>2-</sup>), (l) nitrate (NO<sub>3</sub><sup>-</sup>), (m) ammonium (NH<sub>4</sub><sup>+</sup>), (n) elemental carbon (EC), and (o) organic carbon (OC)) categorized based on the OM-available data utilized in this study (filled circles) and based on the total measurement data (open diamonds). Error bars represent confidence interval at 95%. The numbers of data for each category group are represented in (b).**
